# Supplementary material for: Egfl6 promotes ovarian cancer progression by enhancing the immunosuppressive functions of tumor-associated myeloid cells
Source: JCI journal article supplement (doi:10.1172/jci175147), 2024-09-23
Supplement: sd1 [file 1]

## Supplemental Figures

### Supplemental Figure S1

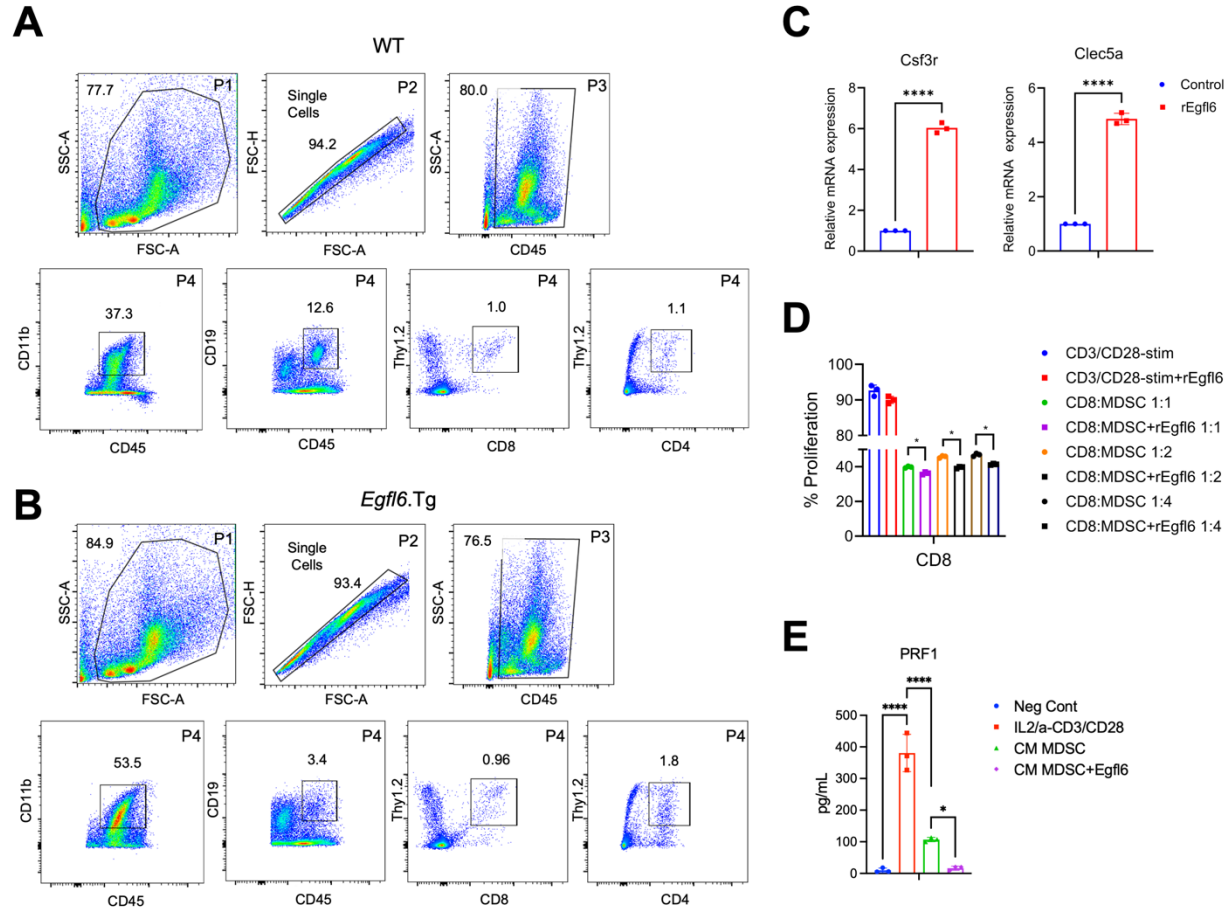

**Supplemental Figure S1. *Egfl6* modulates MDSC phenotype.** **A-B)** Representative gating of CD11b<sup>+</sup>, B, CD8, and CD4 T cells in BM of WT (A) and *Egfl6* transgenic mice (*Egfl6.Tg*) mice (B). **C)** qPCR analyses of *Csf3r* and *Clec5a* in sorted BM CD11b<sup>+</sup> cells stimulated with rGM-CSF + rEgfl6. Stimulation with rGM-CSF alone was used as control. **D)** Graph represents the % proliferation of IL-2 + CD3/CD28 activated CD8 T cells and cultured directly with rEgfl6-induced BM-derived MDSC or MDSC cells at different ratio. **E)** ELISA assay of Perforin 1 (PRF1) in IL-2 + CD3/CD28 activated CD8 T cells and cultured with the conditioned media (CM) of rEgfl6-stimulated BM-derived MDSC cells or MDSC control. Unstimulated CD8 T cells were used as negative control (Neg Cont). Experiments were completed in triplicate. *P* values were calculated using unpaired two-tailed *t* test or ordinary one-way ANOVA analyses. Data are presented as mean  $\pm$  SEM. \**P* < 0.05, \*\**P* < 0.01, \*\*\**P* < 0.001, \*\*\*\**P* < 0.0001.

## Supplemental Figure S2

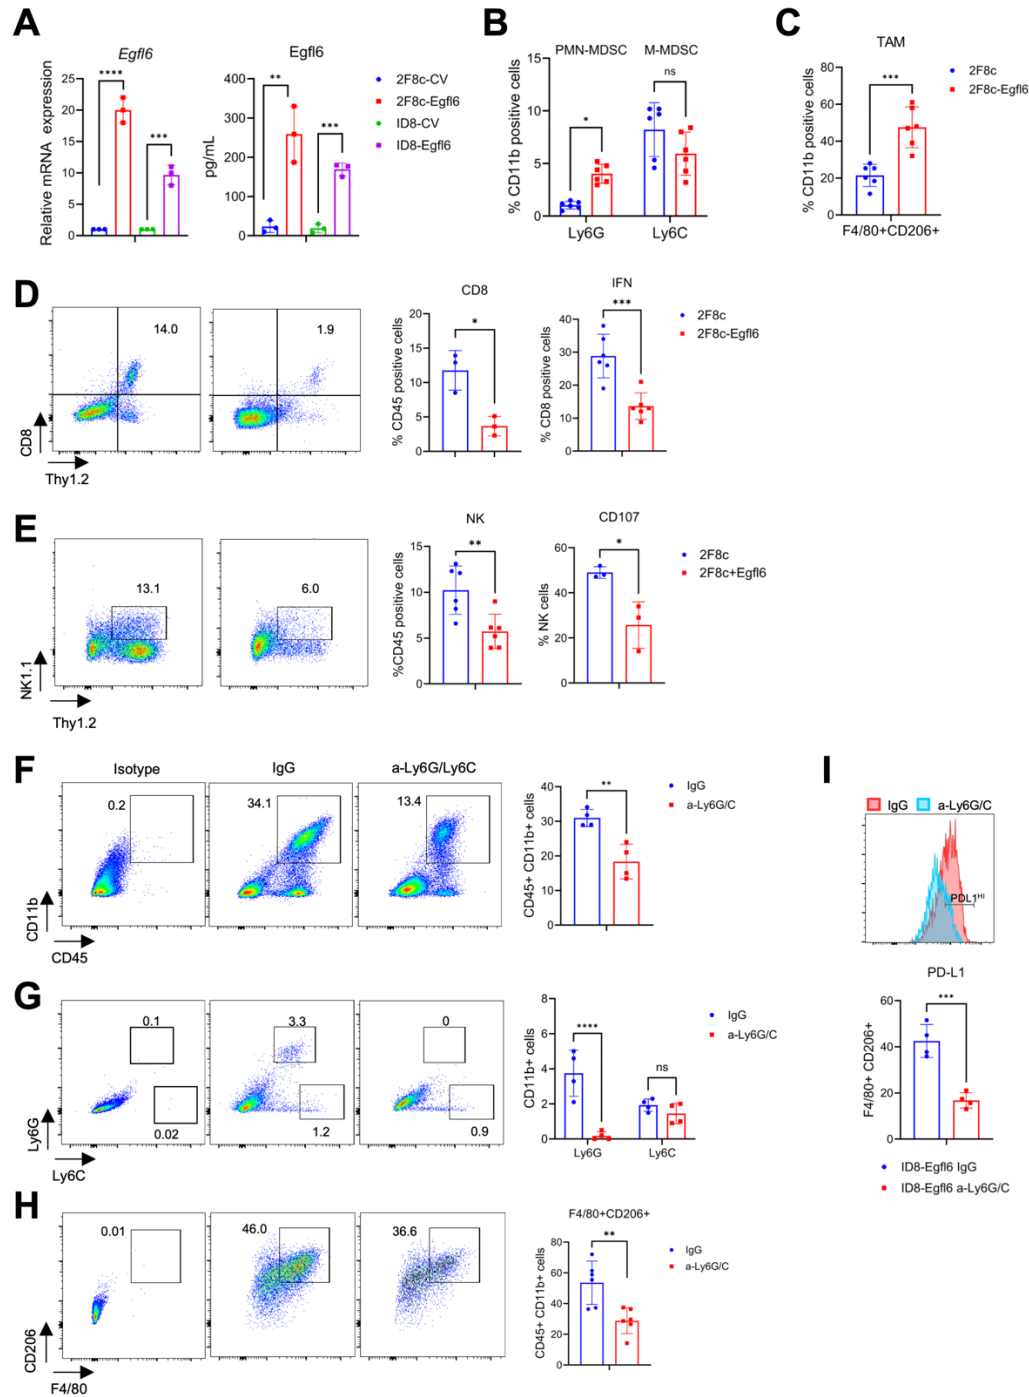

**Supplemental Figure S2. Egfl6 induces accumulation of tumor-infiltrating myeloid cells and reduces the number of activated CD8 T and NK cells.** A) Graphs showing qPCR analyses of *Egfl6* (left panel) and ELISA quantification of secreted Egfl6 protein (right panel) analyses in

2F8c<sup>+</sup>/<sup>-</sup>Egfl6 and ID8<sup>+</sup>/<sup>-</sup>Egfl6 cells. **B-C**) Graphs showing the quantification of (B) PMN-MDSCs (CD11b<sup>+</sup>Ly6G<sup>+</sup>Ly6C<sup>-</sup>), M-MDSCs (CD11b<sup>+</sup>Ly6G<sup>-</sup>Ly6C<sup>+</sup>), and (C) TAMs (CD11b<sup>+</sup>F4/80<sup>+</sup>CD206<sup>+</sup>) in 2F8c<sup>+</sup>/<sup>-</sup>Egfl6 tumors (n=6 mice per group). **D-E**) Flow cytometric evaluation and quantification of (D) CD8 T (CD45<sup>+</sup>Thy1.2<sup>+</sup>) and (E) NK cells and their expression of IFN- $\gamma$  and CD107, respectively, in 2F8c<sup>+</sup>/<sup>-</sup>Egfl6 tumors (n=6 mice per group). **F-H**) Flow cytometric quantification of (F) myeloid cells (CD45<sup>+</sup>CD11b<sup>+</sup>), (G) PMN-MDSCs (CD11b<sup>+</sup>Ly6G<sup>+</sup>Ly6C<sup>-</sup>), M-MDSCs (CD11b<sup>+</sup>Ly6G<sup>-</sup>Ly6C<sup>+</sup>), and (H) CD206<sup>+</sup> TAMs (F4/80<sup>+</sup>CD206<sup>+</sup>) in ID8-Egfl6 ascites treated with anti-Ly6G/Ly6C or IgG isotype control. **I**) Gating and quantification of CD206<sup>+</sup> TAMs expressing PD-L1. Experiments were completed at least in triplicate. *P* values were calculated using unpaired two-tailed *t* test or two-way ANOVA analyses. Data are presented as mean  $\pm$  SEM. \**P* < 0.05, \*\**P* < 0.01, \*\*\**P* < 0.001 and \*\*\*\**P* < 0.0001.

## Supplemental Figure S3

**A**

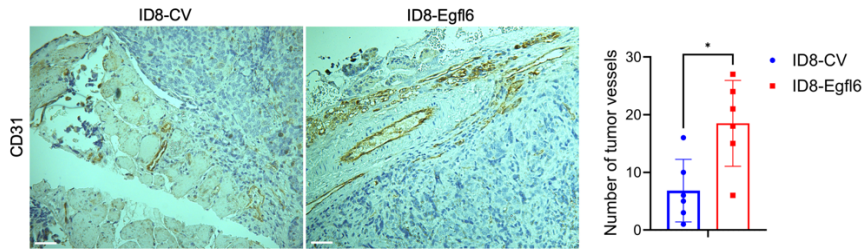

**B**

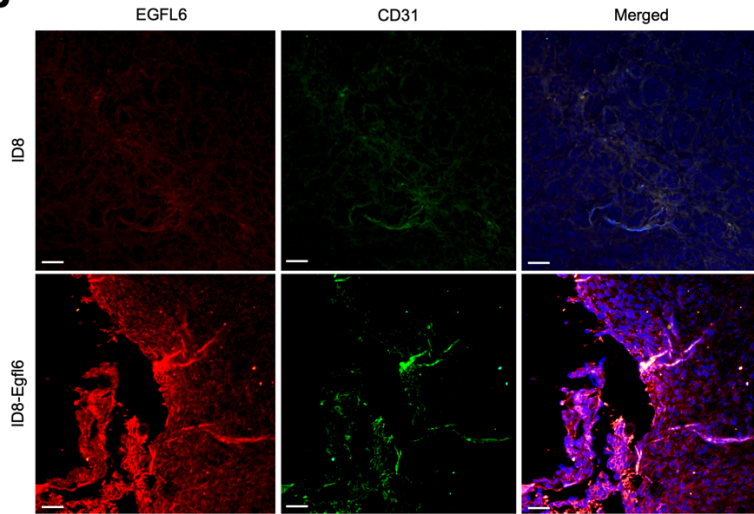

**Supplemental Figure S3. Tumor Egfl6 increased the number of CD31<sup>+</sup> cells. A)** Representative immunohistochemistry images and quantification of CD31 expression in ID8-CV and ID8-Egfl6 tissue samples (n=6 per group). *P* values were calculated using unpaired two-tailed *t* test. Data are presented as mean ± SEM. \**P* < 0.05. **B)** Representative immunofluorescence images showing the co-expression of Egfl6 in endothelial cells (CD31<sup>+</sup> cells) (n=3 per group). Scale bars 100µm.

## Supplemental Figure S4

**A**

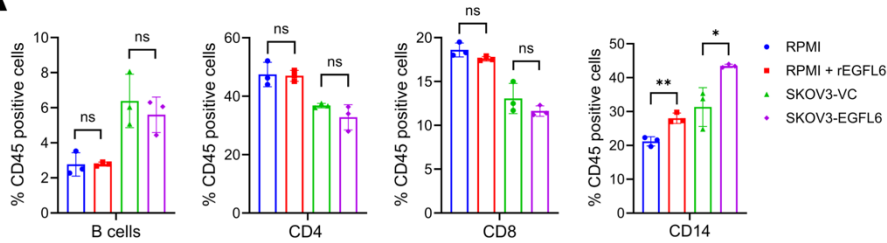

**B**

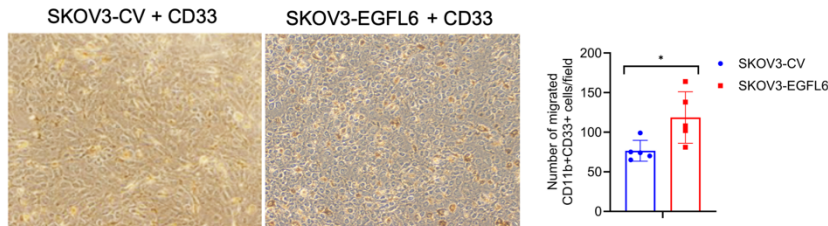

**C**

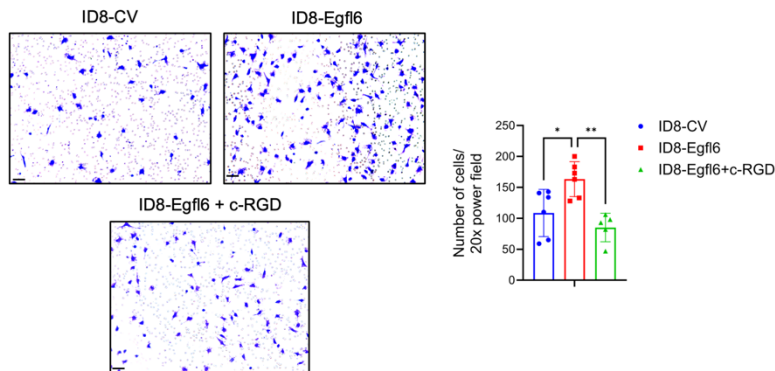

**D**

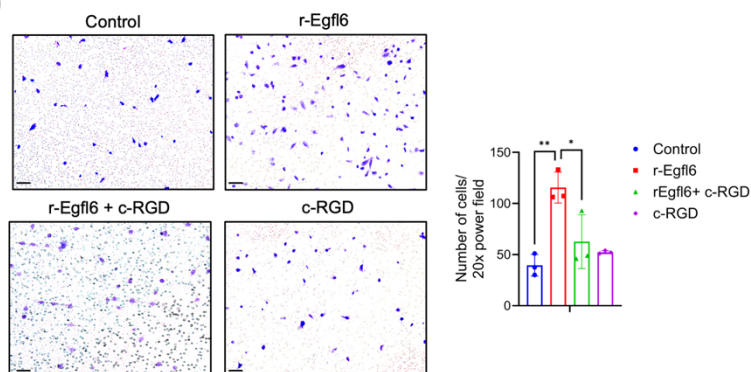

## Supplemental Figure S4. Egfl6 induces migratory activities in myeloid cells via $\beta 3$ integrin.

**A)** Graphs represent flow cytometry quantification of Transwell-migration assay showing the number of PBMCs (top chamber) that migrated toward complete RPMI media +/- rEGFL6 (bottom chamber). **B)** Representative IHC images and quantification of anti-CD11b on HGSOc ascites CD33<sup>+</sup> migrated cells toward SKOV3-CV or SKOV3-EGFL6. **C-D)** Representative images and quantification of Transwell-migration assay showing the number of BM-isolated

CD11b<sup>+</sup> cells seeded onto the top chamber migrated toward: (C) ID8-CV or ID8-Egfl6 cells plated in the lower chamber; (D) or complete media containing rEgfl6. In indicated experiments, c-RGD, a  $\beta$ 3 integrin inhibitor, was added to the bottom chamber. An average of five fields (20X) were acquired from each sample. Scale bars, 20  $\mu$ m. Experiments were completed at least in triplicate. Data are presented as mean  $\pm$  SEM, results were analyzed using unpaired two-tailed *t* test or ordinary one-way ANOVA. \**P* < 0.05, \*\**P* < 0.01.

## Supplemental Figure S5

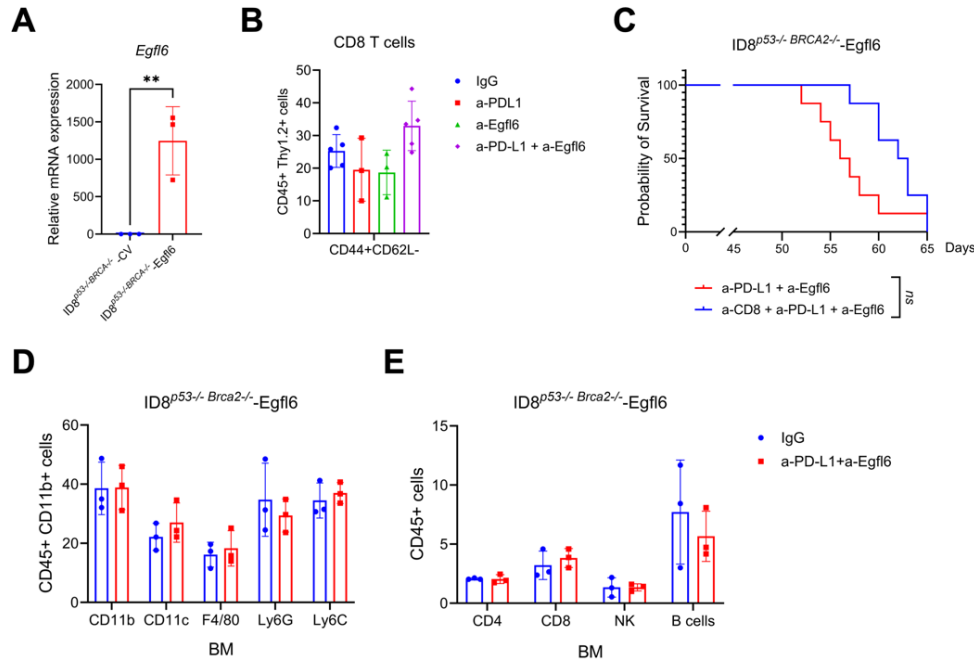

**Supplemental Figure S5. CD8 T cell depletion does not affect a-Egfl6 + a-PD-L1 in ID8<sup>p53-/-</sup>Brca2<sup>-/-</sup>-Egfl6 tumors.** **A)** Graph shows qPCR analysis of *Egfl6* expression in ID8<sup>p53-/-</sup>Brca2<sup>-/-</sup>-Egfl6 vs ID8<sup>p53-/-</sup>Brca2<sup>-/-</sup>-CV cells. **B)** Flow cytometry quantification of CD44<sup>+</sup>CD62L<sup>-</sup> CD8 T cells in ID8<sup>p53-/-</sup>Brca2<sup>-/-</sup>-Egfl6 tumors receiving the indicated treatments. **C)** Kaplan-Meier survival analysis for ID8<sup>p53-/-</sup>Brca2<sup>-/-</sup>-Egfl6 tumor bearing mice receiving the dual treatment, a-Egfl6 + a-PD-L1, or the triple treatment, a-CD8 + a-Egfl6 + a-PD-L1. Survival statistics were calculated using log-rank (Mantel-Cox) analysis from Kaplan-Meier survival plots. **D-E)** Flow cytometry quantification of the indicated immune cells isolated from BM of ID8<sup>p53-/-</sup>Brca2<sup>-/-</sup>-Egfl6 tumor bearing mice treated with a-Egfl6 + a-PD-L1Abs or IgG isotype control. Results were analyzed using unpaired two-tailed t-test or two-way ANOVA. Experiments were completed at least in triplicate. Data are presented as mean  $\pm$  SEM. \*\* $P < 0.01$ .
